# Supplementary material for: Cu2O/CuO@rGO heterostructure derived from metal–organic-frameworks as an advanced electrocatalyst for non-enzymatic electrochemical H2O2sensor
Source: Royal Society of Chemistry journal article supplement (doi:10.1039/c6ra23551d), 2016-01-01
Supplement: c6ra23551d1.pdf [file c6ra23551d1.pdf]

## Supporting information

### **Cu<sub>2</sub>O/CuO@rGO Heterostructure Derived from Metal-Organic-Frameworks as an Advanced Electrocatalyst for a Non-enzymatic Electrochemical H<sub>2</sub>O<sub>2</sub> Sensor**

Duoming Wu<sup>a</sup>, Zhaodong Xu<sup>b</sup>, Ting Zhang<sup>b</sup>, Yubo Shao<sup>b</sup>, Pinxian Xi<sup>b</sup>, Hua Li<sup>c</sup> and  
Cailing Xu<sup>\*b</sup>

<sup>a</sup>The First Hospital of Lan Zhou University, <sup>b</sup>State Key Laboratory of Applied Organic Chemistry, Laboratory of Special Function Materials and Structure Design of the Ministry of Education, College of Chemistry and Chemical Engineering, Lanzhou University, Lanzhou 730000, China, <sup>c</sup>Key Laboratory for Magnetism and Magnetic Materials of the Ministry of Education, School of Physical Science and Technology, Lanzhou University, Lanzhou 730000, China

\*Corresponding author:

Cailing Xu: Tel: +86-931-891-2589, FAX: +86-931-891-2582, Email:

[xucl@lzu.edu.cn](mailto:xucl@lzu.edu.cn), [xucl921chem@163.com](mailto:xucl921chem@163.com)

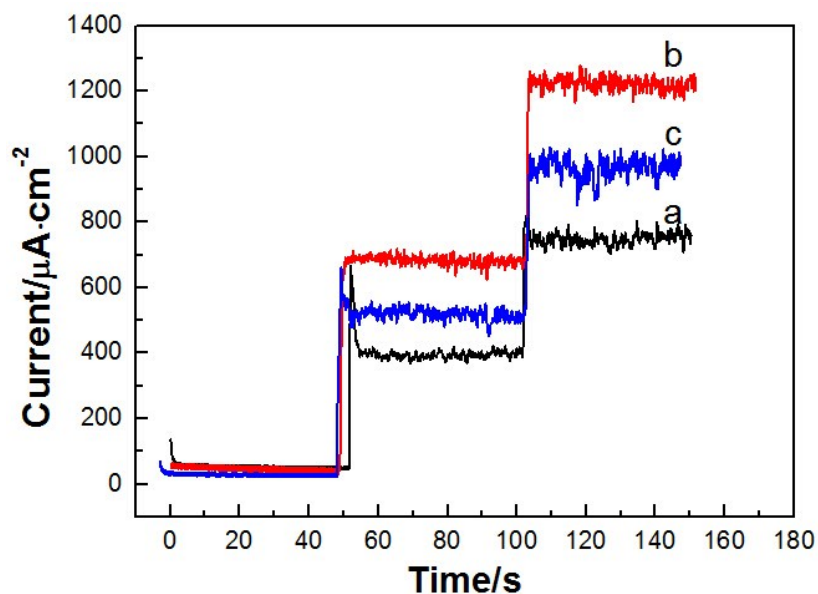

**Fig. S1.** Amperometric responses of the GCE modified by Cu-MOFs/GO-400 (a), Cu-MOFs/GO-600 (b) and Cu-MOFs/GO-800 (c) to 1 mM H<sub>2</sub>O<sub>2</sub> at 0.5 V

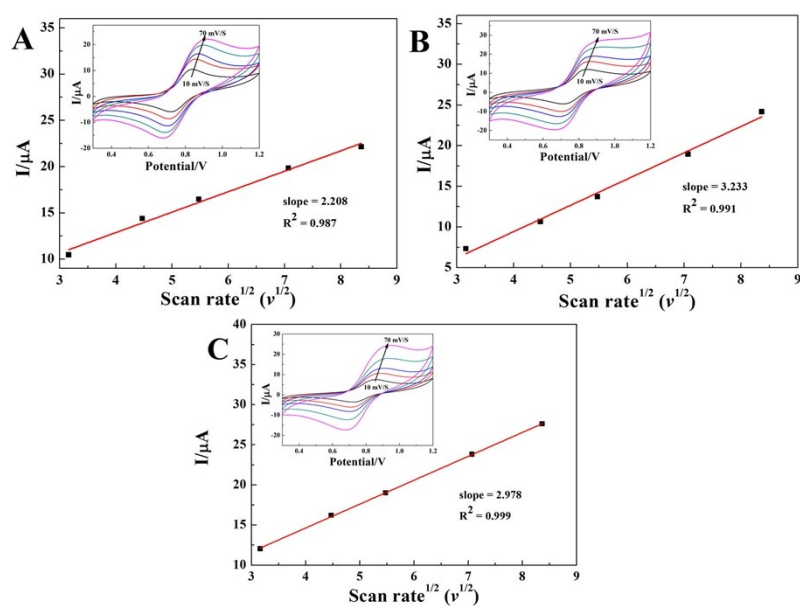

**Fig. S2.** Peak currents vs. the square root of the scan rate ( $\text{v}^{1/2}$ ) for (A) Cu-MOFs/GO-400, (B) Cu-MOFs/GO-600 and (C) Cu-MOFs/GO-800 samples. Insets: cyclic voltammograms (CVs) of the modified electrodes with Cu-MOFs/GO-400, Cu-MOFs/GO-600 and Cu-MOFs/GO-800, respectively, in 5 mM ferricyanide solution containing 0.1 M KCl at different scan rates.

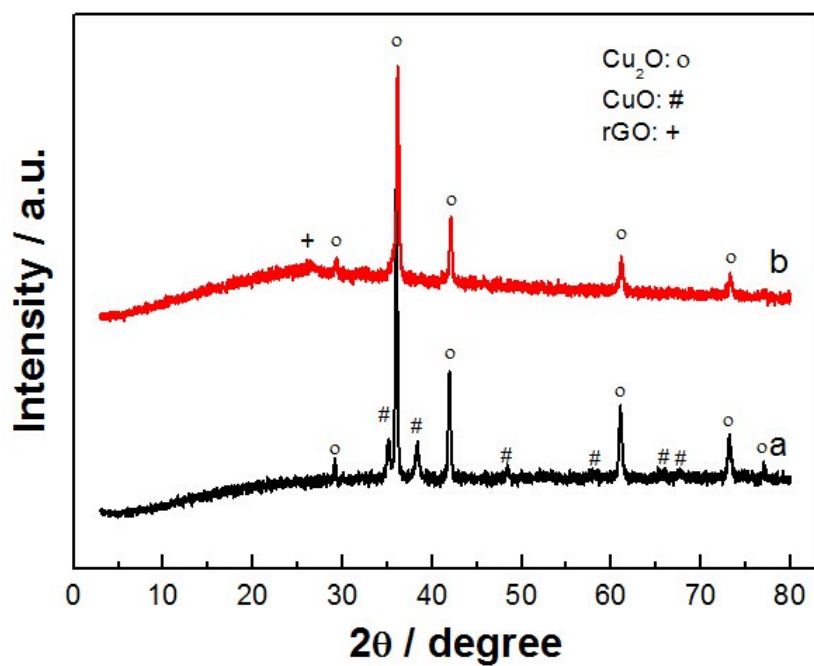

**Fig. S3.** XRD patterns of (a) Cu-MOFs/GO-400 and (b) Cu-MOFs/GO-800 samples

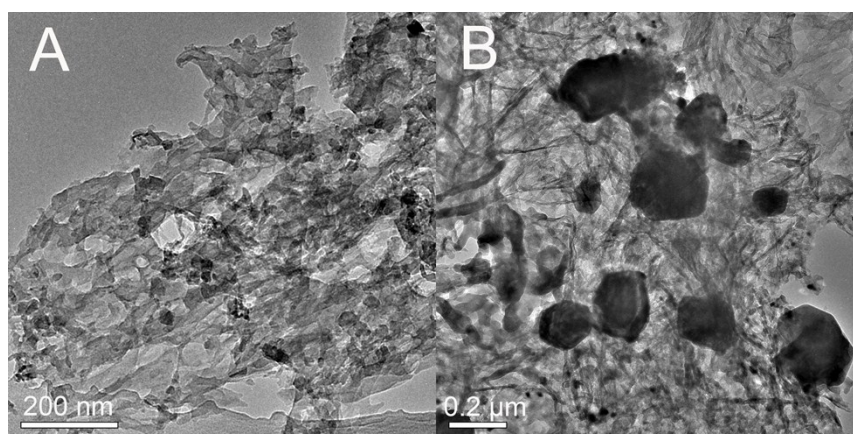

**Fig. S4.** TEM images of (A) Cu-MOFs/GO-400 and (B) Cu-MOFs/GO-800 samples

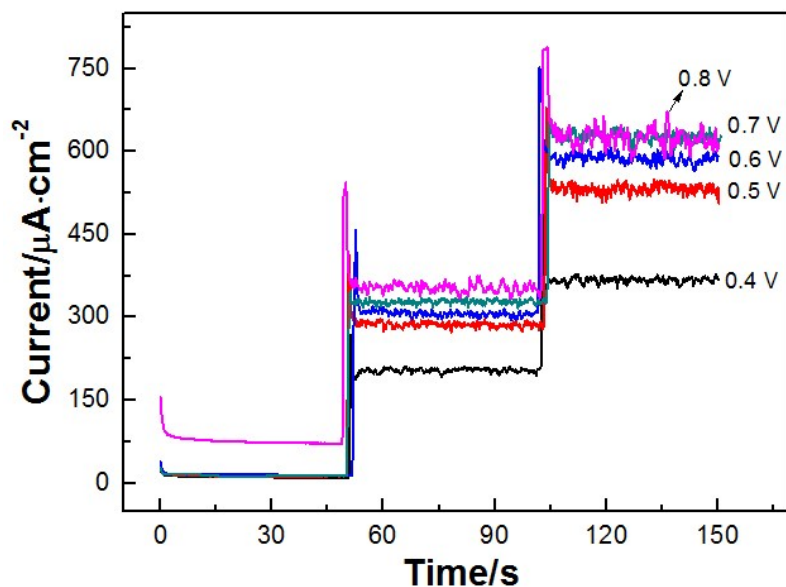

**Fig. S5.** Amperometric responses of the Cu-MOFs/GO-600 modified GCE at different potentials from 0.4 to 0.8 V with the successive addition of 1 mM  $\text{H}_2\text{O}_2$

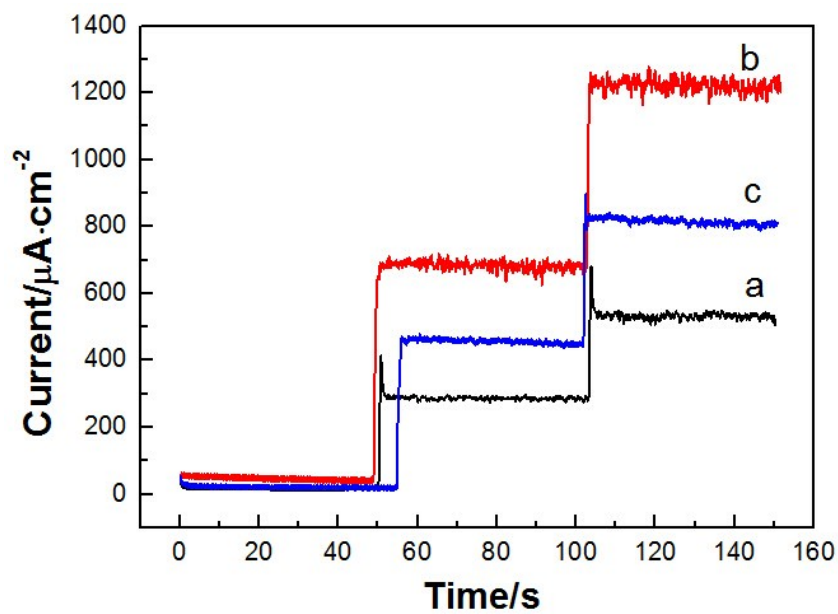

**Fig. S6.** Amperometric responses of the GCE modified by Cu-MOFs/GO-600 with different mass loading: (a) 10  $\mu\text{g}$ , (b) 20  $\mu\text{g}$  and (c) 30  $\mu\text{g}$
